# Supplementary material for: Mueller Matrix Ellipsometric Approach on the Imaging of Sub-Wavelength Nanostructures
Source: Frontiers journal article supplement (doi:10.3389/fphy.2021.814559), 2022-01-21
Supplement: Data_Sheet_1.PDF [file Data_Sheet_1.PDF]

## Supplementary Material

### SUPPLEMENTARY TABLES AND FIGURES

#### Figures

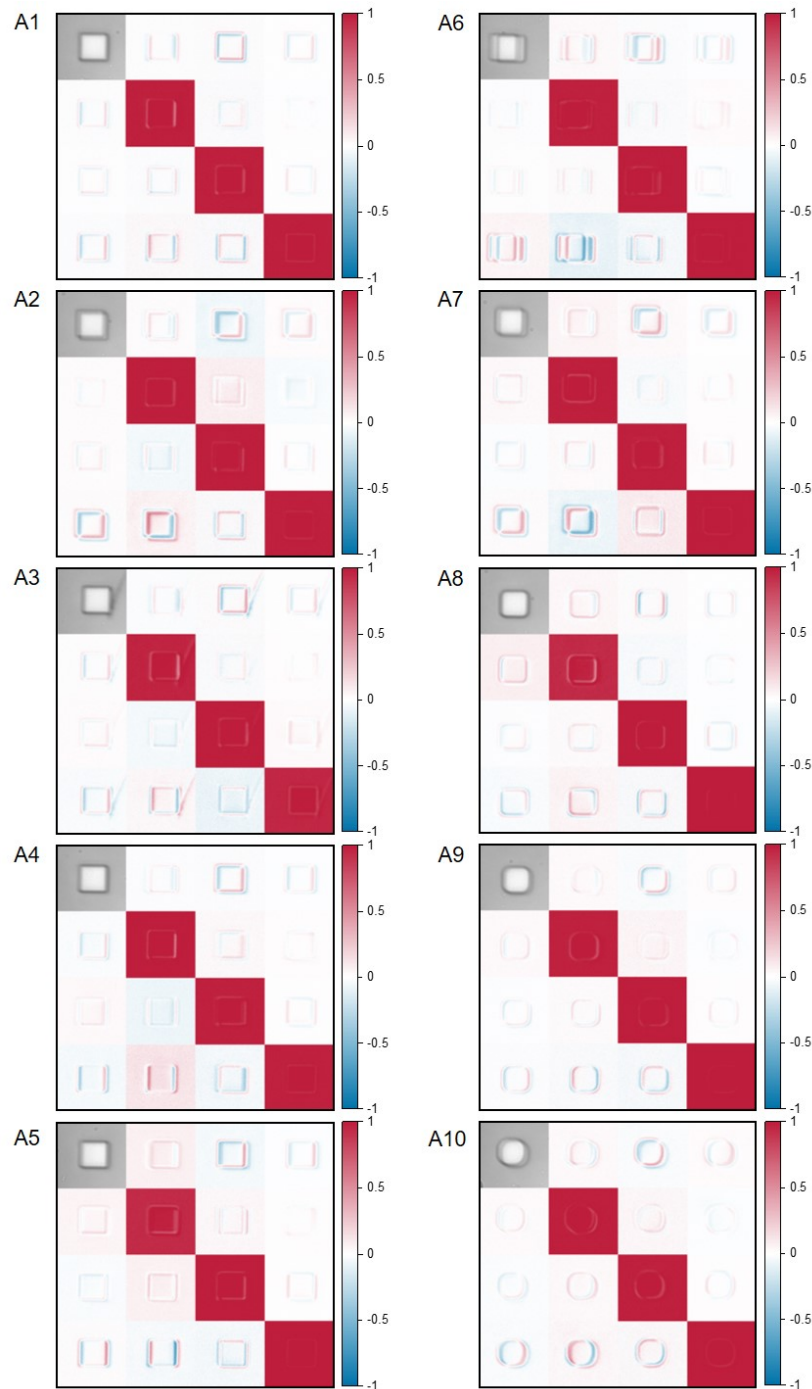

**Figure S1.** Mueller matrix images of structures in row A, not drift corrected.

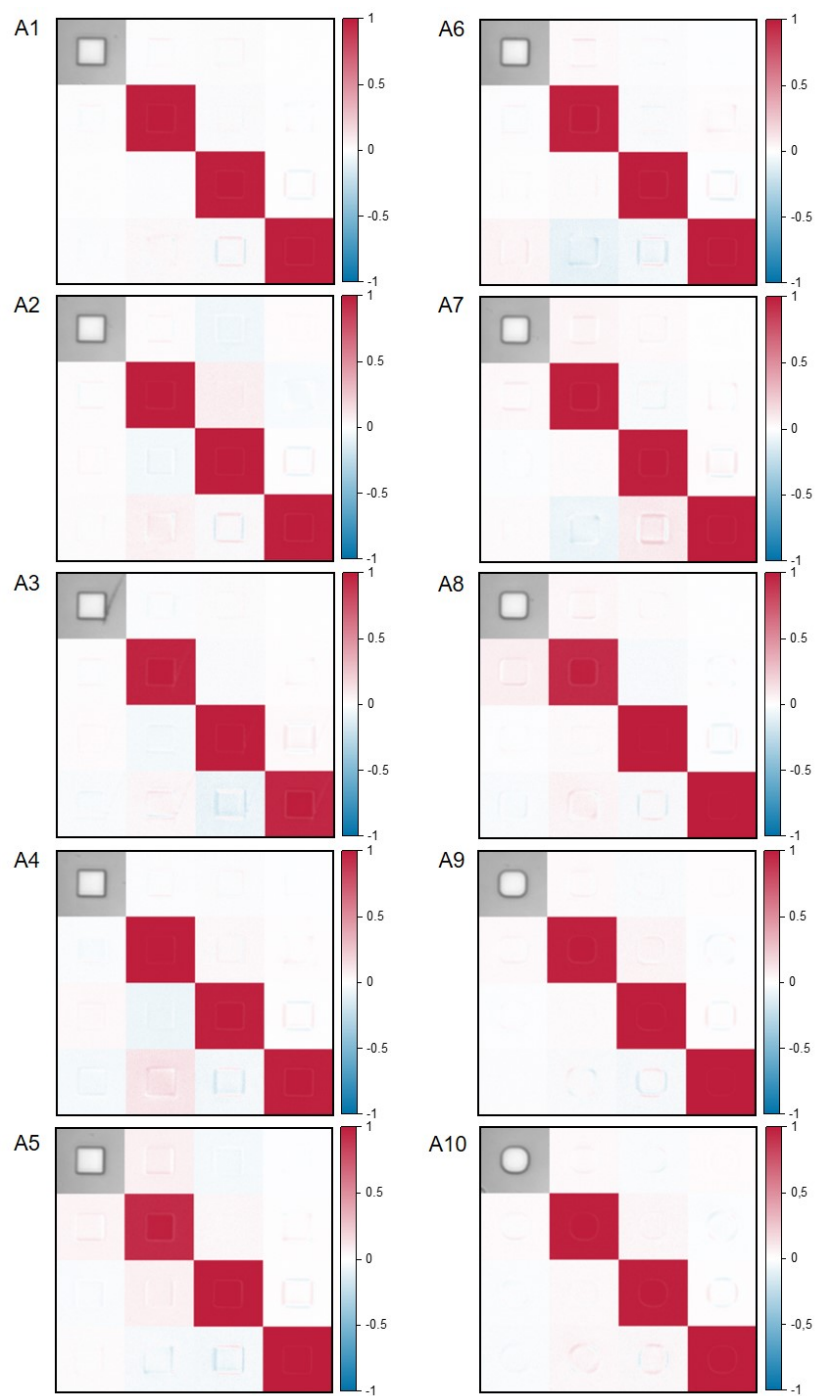

**Figure S2.** Mueller matrix images of structures in row A, drift corrected.

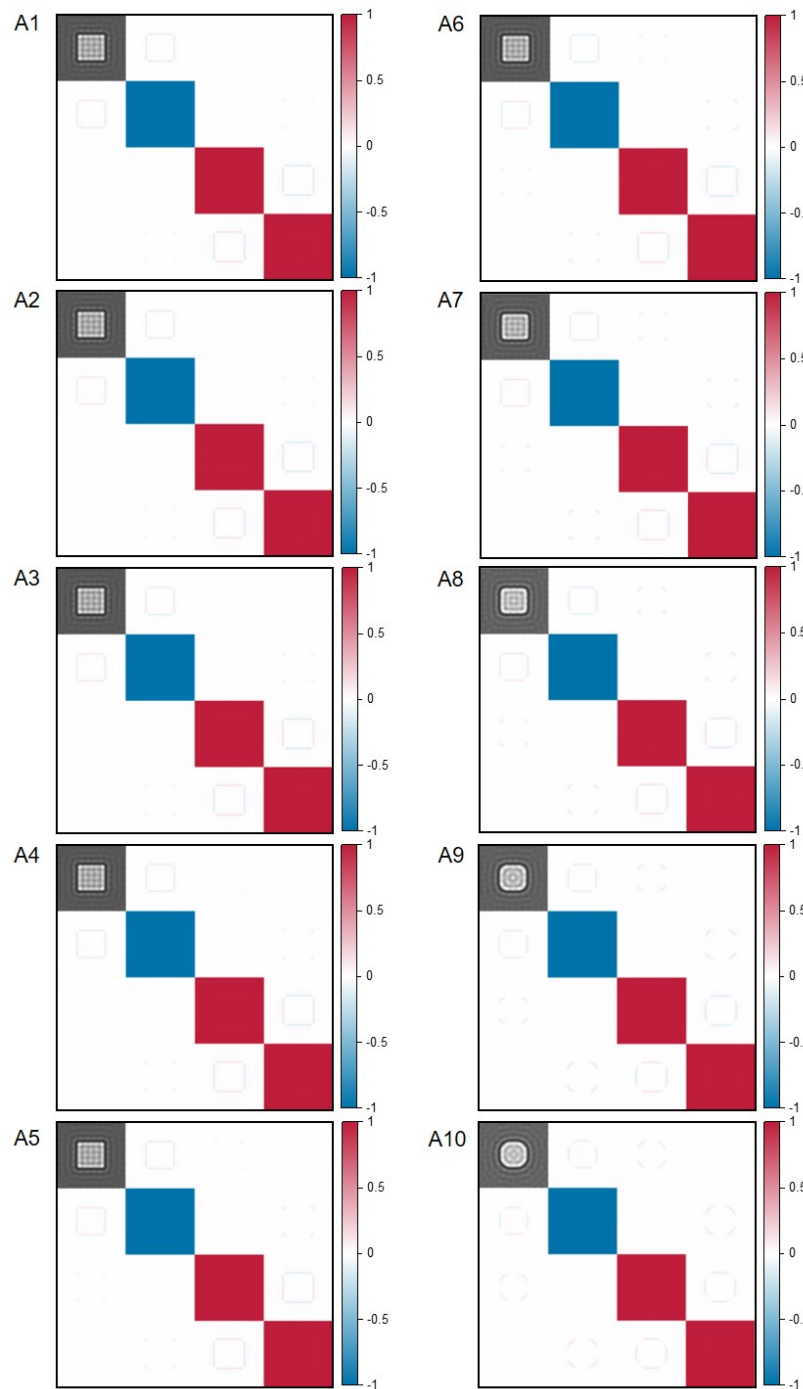

**Figure S3.** Mueller matrix images of structures in row A, simulated.
